# Supplementary material for: Cytokine Modulation in Breast Cancer Patients Undergoing Radiotherapy: A Revision of the Most Recent Studies
Source: PubMed Central journal article supplement (PMC6359111; doi:10.3390/ijms20020382), 2019-01-17
Supplement: ijms-20-00382-s001.pdf [file ijms-20-00382-s001.pdf]

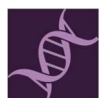

**Table S1.** Reasons for study exclusion.

| First Author (of Excluded Study) | Exclusion Reason(s) after Analysis                                                                                                                                                                                                                                                                                                                                                                                   | PMID     |
|----------------------------------|----------------------------------------------------------------------------------------------------------------------------------------------------------------------------------------------------------------------------------------------------------------------------------------------------------------------------------------------------------------------------------------------------------------------|----------|
| De Santis F et al. 2018          | Reports on the eighth annual conference of “Innovative therapy, monoclonal antibodies, and beyond” held in Milan on Jan. 26, 2018, and hosted by Fondazione IRCCS–Istituto Nazionale dei Tumori (Fondazione IRCCS INT) mainly regarding evidence from preclinical studies in vitro and in vivo                                                                                                                       | 30393044 |
| Masjedi A et al. 2018            |                                                                                                                                                                                                                                                                                                                                                                                                                      | 30372844 |
| Najafi M et al. 2017             | Review where the effects of melatonin on the modulation of immune responses in both normal and tumor tissues are discussed                                                                                                                                                                                                                                                                                           | 28510090 |
| Liu LK et al. 2017               | Review on the pathogenesis and prevention of radiation-induced myocardial fibrosis for providing references for the prevention and treatment of radiation-induced myocardial fibrosis                                                                                                                                                                                                                                | 28440606 |
| Windrichova J et al. 2017        | No RT / treatment indicated: 130 oncological patients with solid tumors (including breast, but no specific indications on these patients’ values/results are given), higher levels of MIC1/GDF15 in patients with bone metastases compared with oncological patients without metastases (serum levels assessed by the xMAP technology using Human Cancer Metastases Biomarker Magnetic Bead Panel - Merck Millipore) | 28314325 |
| Xiao C et al. 2017               | Assessment of plasma cytokines 1 year post-radiotherapy to evaluate possible correlation with fatigue and depressive symptoms                                                                                                                                                                                                                                                                                        | 28193310 |
| Mumbreakar KD et al. 2017        | Study of possible associations between 22 genetic variants in 18 radio-responsive genes and the risk of developing RT-induced acute skin adverse reactions in a cohort of patients with breast cancer                                                                                                                                                                                                                | 27816361 |
| Baijer J et al. 2016             | Peripheral blood mononuclear cells from healthy normal volunteers                                                                                                                                                                                                                                                                                                                                                    | 26982083 |
| Mackey JR et al. 2016            | No cytokines                                                                                                                                                                                                                                                                                                                                                                                                         | 26940688 |
| Klionsky DJ et al. 2016          | Guidelines for the use and interpretation of assays for monitoring autophagy (3rd edition). NO CYTOKINES                                                                                                                                                                                                                                                                                                             | 26799652 |
| Recchia F et al. 2015            | Patients undergoing immunotherapy                                                                                                                                                                                                                                                                                                                                                                                    | 26637906 |
| Yeboa DN and Evans SB. 2016      | Review; no reported articles addressed the selected criteria for study inclusion                                                                                                                                                                                                                                                                                                                                     | 26617212 |
| Patnaik A et al. 2015            | No RT no cytokines                                                                                                                                                                                                                                                                                                                                                                                                   | 26581242 |
| Fontanella C. 2015               | Biphosphonates and denosumab, palliative radiotherapy, bone metastases                                                                                                                                                                                                                                                                                                                                               | 26343511 |
| Kladar NV. 2016                  | Review on effects of the genus <i>Ganoderma</i> spp. reporting mainly results of in vitro and in vivo studies; indication on the use of <i>G. lucidum</i> in clinical trial as additional therapy to reduce side effects of conventional anticancer treatments                                                                                                                                                       | 26317382 |

|                                     |                                                                                                                                 |          |
|-------------------------------------|---------------------------------------------------------------------------------------------------------------------------------|----------|
| <b>Trombetta M. 2015</b>            | Topical application of amnion-derived cellular cytokine solution on irradiated breast skin. No evidence of systemic absorption  | 26240671 |
| <b>Golden EB. 2015</b>              | Endpoint: proportion of patients with abscopal response. Safety and survival                                                    | 26095785 |
| <b>Jung K. 2015</b>                 | Skin toxicity as major side effect of RT for breast cancer. Stimulation with IL-4                                               | 26061397 |
| <b>Jafarzadeh A. 2015</b>           | Chemokine CCL22 may contribute in tumor development. SNP rs223818 may play a role in the susceptibility to breast cancer        | 25722218 |
| <b>Bouillet T. 2015</b>             | Benefits from physical activity and sport among cancer patients seem obvious                                                    | 25660264 |
| <b>Litchfield K. 2015</b>           | Role of genes involved in the development and progression of TGCT (testicular germ cell tumors)                                 | 25609015 |
| <b>Wang Z. 2014</b>                 | IL-8, IL-10, and TNF polymorphisms could serve as useful predictive biomarkers for breast cancer risk among women in East China | 25559835 |
| <b>Markkula A. 2014</b>             | No available data on RT, CHT, RT+CHT, AI, and Tamoxifen treatments                                                              | 25305747 |
| <b>Hellen R et al. 2014</b>         | 2 cases, no mat and met, no statistical analysis, no cytokine variation                                                         | 25224250 |
| <b>Ukaji T and Umezawa K. 2014</b>  | Constitutive expression of NF-kB in cancer stem cells                                                                           | 25128192 |
| <b>Ben Musa R et al. 2014</b>       | 1 case, no RT, no quantitative test for cytokines                                                                               | 24914353 |
| <b>Chien TJ et al. 2014</b>         | Acupuncture and cancer (out of target)                                                                                          | 24716183 |
| <b>Rattay T and Talbot CJ. 2014</b> | Genetic polymorphism and adverse reaction to radiotherapy                                                                       | 24702740 |
| <b>Pan K et al. 2014</b>            | Cytokine-induced killer cell immunotherapy (survival study)                                                                     | 24668644 |
| <b>Whiteside TL. 2014</b>           | Inducible (i) or adaptive Treg in patients with HNSCC and treatments with chemotherapy                                          | 24213679 |
| <b>Chin AR and Wang SE. 2014</b>    | Review on cytokines driving breast cancer stemness and their mechanisms of action                                               | 23562748 |
